# Supplementary material for: A Study of the Mechanical Properties of Au Nanomeshes
Source: Hindawi journal article supplement (doi:10.1155/2020/5190379), 2020-05-25
Supplement: f1 [file 5190379.f1.zip]

Archive with 8 entries (8 files):
- 5190379/figure6a-simulation.txt
- 5190379/figure6a-test.txt
- 5190379/figure6b-simulation.txt
- 5190379/figure6b-test.txt
- 5190379/figure7-Au film under compressive loading.txt
- 5190379/figure7-Au film under tensil loading.txt
- 5190379/figure7-AuNMs under compressive loading.txt
- 5190379/figure7-AuNMs under tensil loading.txt
