# Supplementary material for: A Study of the Mechanical Properties of Au Nanomeshes
Source: Hindawi journal article supplement (doi:10.1155/2020/5190379), 2020-05-25
Supplement: f1 [file 5190379.f1.zip › 5190379/figure6a-simulation.txt]

0.00E+00 0.988700565
3.01E-02 0.989036017
4.00E-02 0.989036017
4.99E-02 0.989036017
6.02E-02 0.989036017
7.01E-02 0.990448446
8.00E-02 0.990448446
8.99E-02 0.990448446
1.00E-01 0.990448446
1.10E-01 0.990448446
1.20E-01 0.990448446
1.30E-01 0.990448446
1.40E-01 0.991860876
1.50E-01 0.991860876
1.60E-01 0.991860876
1.70E-01 0.991860876
1.80E-01 0.991860876
1.90E-01 0.991860876
2.00E-01 0.991860876
2.10E-01 0.993273305
2.20E-01 0.993273305
2.30E-01 0.993273305
2.40E-01 0.993273305
2.50E-01 0.993273305
2.60E-01 0.993273305
2.70E-01 0.993273305
2.80E-01 0.994685734
2.90E-01 0.994685734
3.00E-01 0.994685734
3.10E-01 0.994685734
3.20E-01 0.994685734
3.30E-01 0.994685734
3.40E-01 0.996098164
3.50E-01 0.996098164
3.60E-01 0.996098164
3.70E-01 0.997510593
3.80E-01 0.997510593
3.90E-01 0.997510593
4.00E-01 0.998923023
4.10E-01 0.998923023
4.20E-01 0.998923023
4.30E-01 1.000335452
4.40E-01 1.000335452
4.50E-01 1.000335452
4.60E-01 1.001747881
4.70E-01 1.001747881
4.80E-01 1.001747881
4.90E-01 1.001747881
5.00E-01 1.001747881
5.10E-01 1.001747881
5.20E-01 1.003160311
5.30E-01 1.003160311
5.40E-01 1.003160311
5.50E-01 1.003160311
5.60E-01 1.003160311
5.70E-01 1.003160311
5.80E-01 1.003160311
5.90E-01 1.00457274
6.00E-01 1.00457274
6.10E-01 1.00457274
6.20E-01 1.00457274
6.30E-01 1.00457274
6.40E-01 1.00457274
6.50E-01 1.00457274
6.60E-01 1.005985169
6.70E-01 1.005985169
6.80E-01 1.005985169
6.90E-01 1.005985169
7.00E-01 1.005985169
7.10E-01 1.005985169
7.20E-01 1.005985169
7.30E-01 1.007397599
7.40E-01 1.007397599
7.50E-01 1.007397599
7.60E-01 1.007397599
7.70E-01 1.007397599
7.80E-01 1.007397599
7.90E-01 1.008810028
8.00E-01 1.008810028
8.10E-01 1.008810028
8.20E-01 1.010222458
8.30E-01 1.010222458
8.40E-01 1.011634887
8.50E-01 1.011634887
8.60E-01 1.011634887
8.70E-01 1.011634887
8.80E-01 1.013047316
8.90E-01 1.013047316
9.00E-01 1.013047316
9.10E-01 1.014459746
9.20E-01 1.014459746
9.30E-01 1.014459746
9.40E-01 1.014459746
9.50E-01 1.014459746
9.60E-01 1.015522599
9.70E-01 1.015522599
9.80E-01 1.015522599
9.90E-01 1.015522599
1.00E+00 1.015522599
1.01E+00 1.015522599
1.02E+00 1.015522599
1.03E+00 1.015522599
1.04E+00 1.015522599
1.05E+00 1.015522599
1.06E+00 1.015522599
1.07E+00 1.015522599
1.08E+00 1.015522599
1.09E+00 1.015522599
1.10E+00 1.015522599
1.11E+00 1.015522599
1.12E+00 1.015522599
1.13E+00 1.015522599
1.14E+00 1.015522599
1.15E+00 1.015522599
1.16E+00 1.02E+00
1.17E+00 1.03E+00
1.18E+00 1.03E+00
1.19E+00 1.04E+00
1.20E+00 1.05E+00
1.21E+00 1.06E+00
1.22E+00 1.07E+00
1.23E+00 1.09E+00
1.24E+00 1.11E+00
1.25E+00 1.12E+00
1.26E+00 1.14E+00
1.27E+00 1.16E+00
1.28E+00 1.17E+00
1.29E+00 1.19E+00
1.30E+00 1.22E+00
1.31E+00 1.24E+00
1.32E+00 1.26E+00
1.33E+00 1.29E+00
1.34E+00 1.31E+00
1.35E+00 1.33E+00
1.36E+00 1.36E+00
1.37E+00 1.39E+00
1.38E+00 1.42E+00
1.39E+00 1.44E+00
1.40E+00 1.46E+00
1.41E+00 1.49E+00
1.42E+00 1.52E+00
1.43E+00 1.55E+00
1.44E+00 1.58E+00
1.45E+00 1.61E+00
1.46E+00 1.65E+00
1.47E+00 1.68E+00
1.48E+00 1.71E+00
1.49E+00 1.75E+00
1.50E+00 1.78E+00
1.51E+00 1.81E+00
1.52E+00 1.84E+00
1.53E+00 1.87E+00
1.54E+00 1.91E+00
1.55E+00 1.95E+00
1.56E+00 1.99E+00
1.57E+00 2.03E+00
1.58E+00 2.06E+00
1.59E+00 2.10E+00
1.60E+00 2.14E+00
1.61E+00 2.18E+00
1.62E+00 2.23E+00
1.63E+00 2.27E+00
1.64E+00 2.30E+00
1.65E+00 2.34E+00
1.66E+00 2.39E+00
1.67E+00 2.43E+00
1.68E+00 2.48E+00
1.69E+00 2.53E+00
1.70E+00 2.57E+00
1.71E+00 2.62E+00
1.72E+00 2.67E+00
1.73E+00 2.72E+00
1.74E+00 2.78E+00
1.75E+00 2.83E+00
1.76E+00 2.87E+00
1.77E+00 2.92E+00
1.78E+00 2.98E+00
1.79E+00 3.04E+00
1.80E+00 3.10E+00
1.81E+00 3.16E+00
1.82E+00 3.23E+00
1.83E+00 3.30E+00
1.84E+00 3.37E+00
1.85E+00 3.44E+00
1.86E+00 3.52E+00
1.87E+00 3.60E+00
1.88E+00 3.66E+00
1.89E+00 3.75E+00
1.90E+00 3.85E+00
1.91E+00 3.96E+00
1.92E+00 4.09E+00
1.93E+00 4.22E+00
