# Supplementary material for: A Study of the Mechanical Properties of Au Nanomeshes
Source: Hindawi journal article supplement (doi:10.1155/2020/5190379), 2020-05-25
Supplement: f1 [file 5190379.f1.zip › 5190379/figure6a-test.txt]

0.00E+00	     1.00E+00
2.88E-01	     1.01E+00
5.75E-01	     1.01E+00
8.63E-01	     1.01E+00
1.15E+00	     1.02E+00
1.44E+00	     1.03E+00
1.73E+00      1.05E+00
2.01E+00	     1.31E+00
2.30E+00	     2.43E+00
