# Supplementary material for: A Study of the Mechanical Properties of Au Nanomeshes
Source: Hindawi journal article supplement (doi:10.1155/2020/5190379), 2020-05-25
Supplement: f1 [file 5190379.f1.zip › 5190379/figure6b-simulation.txt]

0.00E+00	1.000704722
6.08E-03	1.00079678
1.22E-02	1.000888838
1.79E-02	1.000980896
2.40E-02	1.001072955
3.00E-02	1.001165013
3.61E-02	1.001257071
4.18E-02	1.001349129
4.79E-02	1.001441187
5.40E-02	1.001533246
6.01E-02	1.001625304
6.62E-02	1.001717362
7.19E-02	1.00180942
7.80E-02	1.001901479
8.40E-02	1.001993537
9.01E-02	1.002085595
9.58E-02	1.002177653
1.02E-01	1.002269712
1.08E-01	1.00236177
1.14E-01	1.002453828
1.20E-01	1.002545886
1.26E-01	1.002637944
1.32E-01	1.002730003
1.38E-01	1.002822061
1.44E-01	1.002914119
1.50E-01	1.003006177
1.56E-01	1.003098236
1.62E-01	1.003190294
1.68E-01	1.003282352
1.74E-01	1.00337441
1.80E-01	1.003466469
1.86E-01	1.003558527
1.92E-01	1.003650585
1.98E-01	1.003742643
2.04E-01	1.003834702
2.10E-01	1.00392676
2.16E-01	1.004018818
2.22E-01	1.004110876
2.28E-01	1.004202934
2.34E-01	1.004294993
2.40E-01	1.004387051
2.46E-01	1.004479109
2.52E-01	1.004571167
2.58E-01	1.004663226
2.64E-01	1.004755284
2.70E-01	1.004847342
2.76E-01	1.0049394
2.82E-01	1.005031459
2.88E-01	1.005123517
2.94E-01	1.005215575
3.00E-01	1.005307633
3.06E-01	1.005399691
3.12E-01	1.00549175
3.18E-01	1.005583808
3.24E-01	1.005675866
3.30E-01	1.005767924
3.36E-01	1.005859983
3.42E-01	1.005952041
3.48E-01	1.006044099
3.54E-01	1.006136157
3.60E-01	1.006228216
3.66E-01	1.006320274
3.72E-01	1.006412332
3.78E-01	1.00650439
3.84E-01	1.006596448
3.90E-01	1.006688507
3.96E-01	1.006780565
4.02E-01	1.006872623
4.08E-01	1.006964681
4.14E-01	1.00705674
4.20E-01	1.007148798
4.26E-01	1.007240856
4.32E-01	1.007332914
4.38E-01	1.007424973
4.44E-01	1.007517031
4.50E-01	1.007609089
4.56E-01	1.007701147
4.62E-01	1.007793205
4.68E-01	1.007885264
4.74E-01	1.007977322
4.80E-01	1.00806938
4.86E-01	1.008161438
4.92E-01	1.008253497
4.98E-01	1.008345555
5.04E-01	1.008437613
5.10E-01	1.008529671
5.16E-01	1.00862173
5.22E-01	1.008713788
5.28E-01	1.008805846
5.34E-01	1.008897904
5.40E-01	1.008989962
5.46E-01	1.009082021
5.52E-01	1.009174079
5.58E-01	1.009266137
5.64E-01	1.009358195
5.70E-01	1.009450254
5.76E-01	1.009542312
5.82E-01	1.00963437
5.88E-01	1.009726428
5.94E-01	1.009818487
6.00E-01	1.009910545
6.06E-01	1.010002603
6.12E-01	1.010094661
6.18E-01	1.010186719
6.24E-01	1.010278778
6.30E-01	1.010370836
6.36E-01	1.010462894
6.42E-01	1.010554952
6.48E-01	1.010647011
6.54E-01	1.010739069
6.60E-01	1.010831127
6.66E-01	1.010923185
6.72E-01	1.011015244
6.78E-01	1.011107302
6.84E-01	1.01119936
6.90E-01	1.011291418
6.96E-01	1.011383476
7.02E-01	1.011475535
7.08E-01	1.011567593
7.14E-01	1.011659651
7.20E-01	1.011751709
7.26E-01	1.011843768
7.32E-01	1.011935826
7.38E-01	1.012027884
7.44E-01	1.012119942
7.50E-01	1.012212001
7.56E-01	1.012304059
7.62E-01	1.012396117
7.68E-01	1.012488175
7.74E-01	1.012580234
7.80E-01	1.012672292
7.86E-01	1.01276435
7.92E-01	1.012856408
7.98E-01	1.012948466
8.04E-01	1.013040525
8.10E-01	1.013132583
8.16E-01	1.013224641
8.22E-01	1.013316699
8.28E-01	1.013408758
8.34E-01	1.013500816
8.40E-01	1.013592874
8.46E-01	1.013684932
8.52E-01	1.013776991
8.58E-01	1.013869049
8.64E-01	1.013961107
8.70E-01	1.014053165
8.76E-01	1.014145223
8.82E-01	1.014237282
8.88E-01	1.01432934
8.94E-01	1.014421398
9.00E-01	1.014513456
9.06E-01	1.014605515
9.12E-01	1.014697573
9.18E-01	1.014789631
9.24E-01	1.014881689
9.30E-01	1.014973748
9.36E-01	1.015065806
9.42E-01	1.015157864
9.48E-01	1.015249922
9.54E-01	1.01534198
9.60E-01	1.015434039
9.66E-01	1.015526097
9.72E-01	1.015618155
9.78E-01	1.015710213
9.84E-01	1.015802272
9.90E-01	1.01589433
9.96E-01	1.015986388
1.00E+00	1.016078446
1.01E+00	1.016170505
1.01E+00	1.016262563
1.02E+00	1.016354621
1.03E+00	1.016446679
1.03E+00	1.016538737
1.04E+00	1.016630796
1.04E+00	1.016722854
1.05E+00	1.016814912
1.06E+00	1.01690697
1.06E+00	1.016999029
1.07E+00	1.017091087
1.07E+00	1.017183145
1.08E+00	1.017275203
1.09E+00	1.017367262
1.09E+00	1.01745932
1.10E+00	1.017551378
1.10E+00	1.017643436
1.11E+00	1.017735494
1.12E+00	1.017827553
1.12E+00	1.017919611
1.13E+00	1.018011669
1.13E+00	1.018103727
1.14E+00	1.018195786
1.15E+00	1.018287844
1.15E+00	1.018379902
1.16E+00	1.01847196
1.16E+00	1.018564019
1.17E+00	1.018656077
1.18E+00	1.018748135
1.18E+00	1.018840193
1.19E+00	1.018932251
1.19E+00	1.01902431
1.20E+00	1.019116368
1.21E+00	1.019208426
1.21E+00	1.019300484
1.22E+00	1.019392543
1.22E+00	1.019484601
1.23E+00	1.019576659
1.24E+00	1.019668717
1.24E+00	1.019760776
1.25E+00	1.019852834
1.25E+00	1.019944892
1.26E+00	1.02003695
1.27E+00	1.020129009
1.27E+00	1.020221067
1.28E+00	1.020313125
1.28E+00	1.020405183
1.29E+00	1.020497241
1.30E+00	1.0205893
1.30E+00	1.0205893
1.31E+00	1.025600918
1.31E+00	1.030612536
1.32E+00	1.035624155
1.33E+00	1.040635773
1.33E+00	1.045647392
1.34E+00	1.05065901
1.34E+00	1.055670628
1.35E+00	1.060682247
1.36E+00	1.065693865
1.36E+00	1.070705483
1.37E+00	1.075717102
1.37E+00	1.08072872
1.38E+00	1.085740339
1.39E+00	1.090751957
1.39E+00	1.095763575
1.40E+00	1.100775194
1.40E+00	1.100775194
1.41E+00	1.123296923
1.42E+00	1.145818652
1.43E+00	1.168340381
1.43E+00	1.190862109
1.44E+00	1.213383838
1.45E+00	1.235905567
1.45E+00	1.258427296
1.46E+00	1.280949025
1.46E+00	1.303470754
1.48E+00	1.325992483
1.48E+00	1.348514212
1.49E+00	1.371035941
1.49E+00	1.39355767
1.50E+00	1.416079399
1.51E+00	1.438601128
1.51E+00	1.461122856
1.52E+00	1.483644585
1.52E+00	1.506166314
1.53E+00	1.528688043
1.54E+00	1.551209772
1.54E+00	1.573731501
1.55E+00	1.59625323
1.55E+00	1.618774959
1.56E+00	1.641296688
1.57E+00	1.663818417
1.57E+00	1.686340146
1.58E+00	1.708861875
1.59E+00	1.731383603
1.60E+00	1.753905332
1.60E+00	1.776427061
1.61E+00	1.79894879
1.61E+00	1.821470519
1.62E+00	1.843992248
1.63E+00	1.866513977
1.63E+00	1.889035706
1.64E+00	1.911557435
1.64E+00	1.934079164
1.65E+00	1.956600893
1.66E+00	1.979122622
1.66E+00	2.00164435
1.67E+00	2.024166079
1.67E+00	2.046687808
1.69E+00	2.069209537
1.69E+00	2.091731266
1.70E+00	2.114252995
1.70E+00	2.136774724
1.72E+00	2.159296453
1.72E+00	2.181818182
1.73E+00	2.204339911
1.73E+00	2.22686164
1.74E+00	2.249383369
1.75E+00	2.271905097
1.75E+00	2.294426826
1.76E+00	2.316948555
1.77E+00	2.339470284
1.78E+00	2.361992013
1.78E+00	2.384513742
1.79E+00	2.407035471
1.79E+00	2.4295572
1.80E+00	2.452078929
1.81E+00	2.474600658
1.81E+00	2.497122387
1.82E+00	2.519644116
1.82E+00	2.542165844
1.83E+00	2.564687573
1.84E+00	2.587209302
1.84E+00	2.609731031
1.85E+00	2.63225276
1.85E+00	2.654774489
1.86E+00	2.677296218
1.87E+00	2.699817947
1.87E+00	2.722339676
1.88E+00	2.744861405
1.88E+00	2.767383134
1.89E+00	2.789904863
1.90E+00	2.812426591
1.90E+00	2.83494832
1.91E+00	2.857470049
1.91E+00	2.879991778
1.91E+00	2.902513507
1.92E+00	2.925035236
1.93E+00	2.947556965
1.93E+00	2.970078694
1.94E+00	2.992600423
1.94E+00	3.015122152
1.95E+00	3.037643881
1.96E+00	3.06016561
1.96E+00	3.082687339
1.97E+00	3.105209067
1.97E+00	3.127730796
1.97E+00	3.150252525
1.98E+00	3.172774254
1.98E+00	3.195295983
1.99E+00	3.217817712
1.99E+00	3.240339441
2.00E+00	3.26286117
