# Supplementary material for: A Study of the Mechanical Properties of Au Nanomeshes
Source: Hindawi journal article supplement (doi:10.1155/2020/5190379), 2020-05-25
Supplement: f1 [file 5190379.f1.zip › 5190379/figure6b-test.txt]

0.00E+00	9.87E-01
2.30E-01	9.89E-01
4.60E-01	9.90E-01
6.90E-01	9.92E-01
9.20E-01	9.93E-01
1.15E+00	9.94E-01
1.38E+00	9.95E-01
1.61E+00	9.96E-01
1.84E+00	1.02E+00
2.07E+00	1.08E+00
2.30E+00	1.90E+00
