# Supplementary material for: A Study of the Mechanical Properties of Au Nanomeshes
Source: Hindawi journal article supplement (doi:10.1155/2020/5190379), 2020-05-25
Supplement: f1 [file 5190379.f1.zip › 5190379/figure7-Au film under compressive loading.txt]

0.00E+00  1.00E+00
3.60E+01  0.52E+01
7.20E+01  3.01E+01
1.08E+02  5.02E+01
1.44E+02  0.69E+02
1.80E+02  1.25E+02
2.16E+02  2.53E+02
2.52E+02  4.76E+02
2.88E+02  0.71E+03
