# Supplementary material for: A Study of the Mechanical Properties of Au Nanomeshes
Source: Hindawi journal article supplement (doi:10.1155/2020/5190379), 2020-05-25
Supplement: f1 [file 5190379.f1.zip › 5190379/figure7-Au film under tensil loading.txt]

0.00E+00  1.00E+00
3.30E+01  0.59E+01
6.60E+01  3.06E+01
9.90E+01  5.19E+01
1.32E+02  0.71E+02
1.65E+02  1.27E+02
1.98E+02  2.58E+02
2.31E+02  4.70E+02
2.64E+02  0.72E+03
