# Supplementary material for: A Study of the Mechanical Properties of Au Nanomeshes
Source: Hindawi journal article supplement (doi:10.1155/2020/5190379), 2020-05-25
Supplement: f1 [file 5190379.f1.zip › 5190379/figure7-AuNMs under tensil loading.txt]

0.00E+00  1.00E+00
5.00E+01  1.00E+00
1.00E+02  1.00E+00
1.50E+02  1.00E+00
2.00E+02  1.00E+00
2.50E+02  1.00E+00
3.00E+02  1.04E+01
3.50E+02  2.06E+01
4.00E+02  0.61E+02
